# Supplementary material for: Substrains matter in phenotyping of C57BL/6 mice
Source: PubMed Central journal article supplement — Exp Anim. 2021 Jan 14;70(2):145–60. doi: 10.1538/expanim.20-0158 (PMC8150240; doi:10.1538/expanim.20-0158), 2021-01-14
Supplement: expanim-70-145-s001.pdf [file expanim-70-145-s001.pdf]

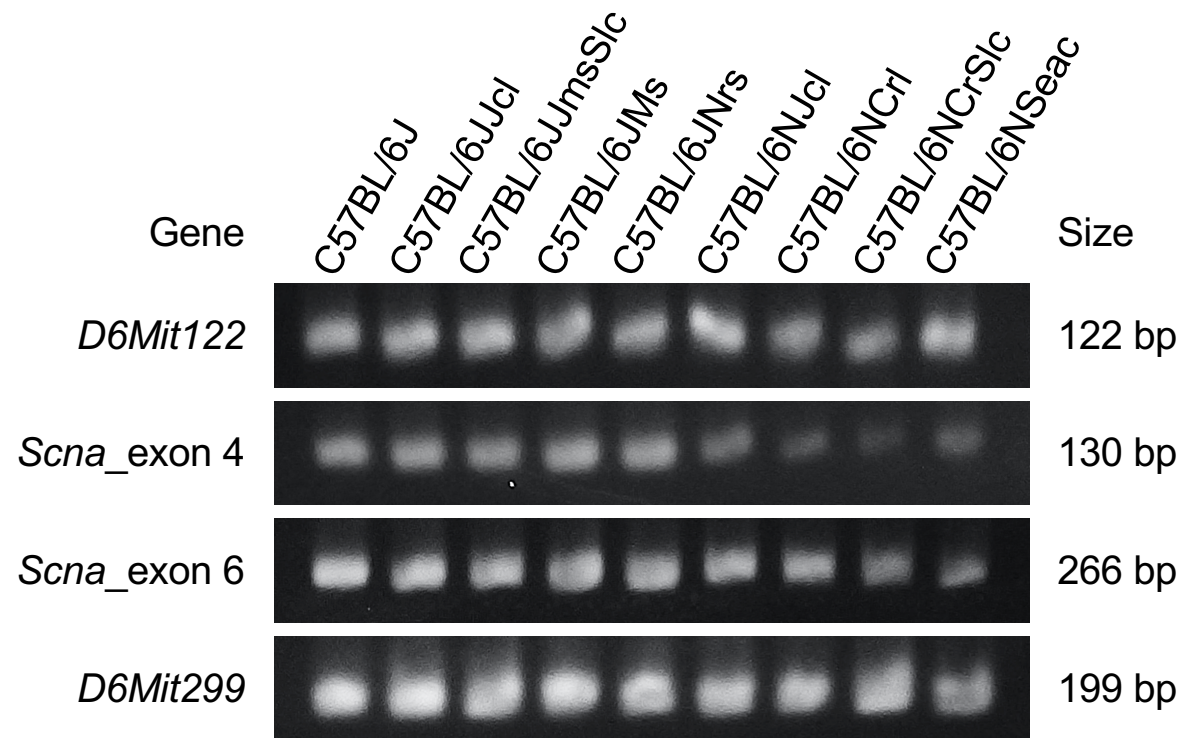

**Supplementary Figure 1.** (Mekada & Yoshiki)

**Supplementary Table 1.** Major C57BL/6 mouse strains in Japan and worldwide, maintained by vendors and individual laboratories

| Strain name         | Source                                                                                 |
|---------------------|----------------------------------------------------------------------------------------|
| C57BL/6J substrains |                                                                                        |
| C57BL/6J            | The Jackson Laboratory (Bar Harbor, MA, USA)                                           |
| C57BL/6JJcl         | CLEA Japan, Inc. (Tokyo, Japan)                                                        |
| C57BL/6JJmsSlc      | Japan SLC, Inc. (Hamamatsu, Japan)                                                     |
| C57BL/6JBomTac      | Taconic Biosciences, Inc. (Rensselaer, NY, USA)                                        |
| C57BL/6JOlaHsd      | Envigo RMS, Inc. (Indianapolis, IN, USA)                                               |
| C57BL/6JRccHsd      | Envigo RMS, Inc. (Indianapolis, IN, USA)                                               |
| C57BL/6JRj          | Janvier Labs (Saint Berthevin, France)                                                 |
| C57BL/6JM5          | National Institute of Genetics (Mishima, Japan)                                        |
| C57BL/6JNrs         | National Institutes for Quantum and Radiological Science and Technology (Chiba, Japan) |
| C57BL/6N substrains |                                                                                        |
| C57BL/6NJ           | The Jackson Laboratory (Bar Harbor, MA, USA)                                           |
| C57BL/6NCrl         | Charles River Laboratories International, Inc. (Wilmington, MA, USA)                   |
| C57BL/6NCrlCrlj     | Charles River Laboratories Japan, Inc. (Yokohama, Japan) (discontinued)                |
| C57BL/6NJcl         | CLEA Japan Inc. (Tokyo, Japan)                                                         |
| C57BL/6NCrSlc       | Japan SLC, Inc. (Hamamatsu, Japan)                                                     |
| C57BL/6NSea         | Kyudo Co. Ltd. (Tosu, Japan)                                                           |
| C57BL/6NTac         | Taconic Biosciences, Inc. (Rensselaer, NY, USA)                                        |
| C57BL/6NHsd         | Envigo RMS, Inc. (Indianapolis, IN, USA)                                               |
| C57BL/6NRj          | Janvier Labs (Saint Berthevin, France)                                                 |
| C57BL/6NHla         | Hilltop Lab Animals, Inc. (Scottsdale, PA, USA)                                        |
| C57BL/6NCrSim       | Simonsen Laboratories, Inc. (Gilroy, CA, USA)                                          |
| C57BL/6ByJ          | The Jackson Laboratory (Bar Harbor, MA, USA)                                           |

**Supplementary Table 2.** Profile of the 45 selected single nucleotide polymorphism (SNP) markers developed for the C57BL/6J substrains

| Locus No. | dbSNP ID   | Chromosome | Position (bp) (GRCm38.p6) | Linked gene       | SNP type                | SNP allele | C57BL/6J allele | Allele flanking primer sequence (5' to 3')            | Product size (bp) | Allele-specific primer sequence (5' to 3')<br>SNP                        | Product size (bp) |
|-----------|------------|------------|---------------------------|-------------------|-------------------------|------------|-----------------|-------------------------------------------------------|-------------------|--------------------------------------------------------------------------|-------------------|
| 1         | rs13475886 | 1          | 61,171,619                |                   | TF binding site variant | T/C        | T/T             | F: GCAGGCTTTTGTGTTTGT<br>R: AGGGGTGGGATGTTATCTGT      | 503               | T F: CAGGAAGAGAAAGTTGAGATTTT<br>C R: GGGTAGAAGTAACCAGGGTCC               | 331<br>217        |
| 2         | rs13476337 | 2          | 8,069,855                 |                   | Intergenic variant      | A/T        | A/A             | F: GCTGATTGGACAACACAGAC<br>R: TCCAAAGAGTGTGCAATCA     | 556               | A R: GGAGAGAAATCCTTTGGAAGATAT<br>T R: GGAGAGAAATCCTTTGGAAGAAAA           | 286<br>286        |
| 3         | rs13476359 | 2          | 16,685,831                | <i>Pbx2</i>       | Intron variant          | G/A        | G/G             | F: CATTGTGGAGATGAAAATGC<br>R: GAAACAATGCCCTTCACAAT    | 498               | G F: CAGGCAATCTGAAACTTAGAAATG<br>A F: CCAGGCAATCTGAAACTTAGAAATA          | 416<br>417        |
| 4         | rs33142586 | 2          | 23,887,704                |                   | Intergenic variant      | A/C        | A/A             | F: CCCATCCTCCATTATCTTT<br>R: AAATCCTCCAGGAGAACTGG     | 498               | A F: CCCATTTCTCCTCTCTGCTA<br>C F: CCATTCTCCTCTCTGCTC                     | 309<br>308        |
| 5         | rs13476956 | 3          | 5,370,727                 | <i>Zfx4</i>       | Intron variant          | C/T        | C/C             | F: AAGAAAGCAATGTGCCAAGC<br>R: TGCATAAGGCTTAAACAGATGAA | 500               | C R: TTAGCAGAGGTTGACTACGCG<br>T R: TTAGCAGAGGTTGACTACGCA                 | 274<br>277        |
| 6         | rs13477019 | 3          | 23,824,920                | <i>Naaladl2</i>   | Intron variant          | T/A        | T/T             | F: TCCAGAAATCACTCTGCTTCC<br>R: CTGGGTTCTCTCTGAAACCA   | 534               | T F: TGTGCATGCAGTTCTAAACACTT<br>A F: TGTGCATGCAGTTCTAAACACTA             | 310<br>310        |
| 7         | rs13477132 | 3          | 58,109,942                | <i>Gm40056</i>    | Intergenic variant      | G/C        | G/G             | F: CCCAGCGATCTGTAGAGTTG<br>R: GAACTGAGGGTTC AAGACCA   | 493               | G F: TGCAGGCATGGTATAAATTGG<br>C R: AGGCCTTCCAGGGGG                       | 295<br>232        |
| 8         | rs13477622 | 6          | 28,322,410                |                   | Intergenic variant      | T/C        | T/T             | F: TTGCAGTTTGGGATGTGAAA<br>R: TCCATGACTGGTAGATGGA     | 499               | T F: CATGGCAGGGCTAGTGTTTT<br>C F: CATGGCAGGGCTAGTGTTC                    | 316<br>316        |
| 9         | rs13477746 | 7          | 65,944,235                | <i>Astm2</i>      | Intron variant          | T/C        | T/T             | F: CCCTGCTGTTCCTGCTAC<br>R: GATTCAAGCCACTTTGGAA       | 516               | T F: GAAGGAAGCACTGGTTAAGGT<br>C F: AAGGAAGCACTGGTTAAGGC                  | 248<br>247        |
| 10        | rs13478320 | 5          | 70,742,061                |                   | Intergenic variant      | C/A        | C/C             | F: GCCCTTAAACCACACTGCTG<br>R: TGTCTTGCCATATGTTCCA     | 574               | C F: GAAACCACACTGGAACAGATTC<br>A F: GGAACCACACTGGAACAGATTA               | 317<br>318        |
| 11        | rs3662161  | 5          | 117,459,347               | <i>Ksr2</i>       | Intron variant          | A/G        | A/A             | F: ACTCTGCTTCTCAGGCTTGG<br>R: AACTAAGCCACCGACTGCAC    | 487               | A No allele-specific primers found<br>G No allele-specific primers found |                   |
| 12        | rs33208334 | 5          | 149,626,021               | <i>Hsph1</i>      | Intron variant          | T/C        | T/T             | F: TGAAGCTCACATCAACACCTG<br>R: TGGTTTTGTGCTTGCACTGT   | 485               | T R: CCAGAACAGGACTTCTCAAACA<br>C R: CCAGAACAGGACTTCTCAAACG               | 317<br>318        |
| 13        | rs30764547 | 6          | 28,715,963                | <i>Snd1/Lrrc4</i> | Intron variant          | T/A        | T/T             | F: CAAGCATGAAGCAGACAAGC<br>R: ATGCAAAAGCAGGAGGAATG    | 495               | T No allele-specific primers found<br>A No allele-specific primers found |                   |
| 14        | rs13478783 | 6          | 60,591,379                | <i>Gm35386</i>    | Downstream gene variant | A/G        | A/A             | F: CTGGCCCAAAGCAAGGTAT<br>R: TATTGAGCGTGTGATGG        | 396               | A R: CCCAGGCCTACCTTTCTTATTT<br>G R: CCCAGGCCTACCTTTCTTAGTC               | 318<br>317        |
| 15        | rs6157367  | 6          | 67,287,180                | <i>Serbp1</i>     | 3 prime UTR variant     | T/A        | T/T             | F: TTTGGCTGATTTGAAATGCT<br>R: TGCAAAACACAAGCCAAGTAA   | 491               | T R: GACTATGGATAAATGGCTACCTCAA<br>A R: GACTATGGATAAATGGCTACCTGAT         | 216<br>216        |
| 16        | rs13479522 | 7          | 129,035,694               |                   | Intergenic variant      | A/G        | A/A             | F: AACGATGGAATGGAGACTGA<br>R: CTCCTTCCAGCACTGTGT      | 494               | A R: CTCAGCATTGACGAGAACA<br>G No allele-specific primers found           | 257               |
| 17        | rs13479540 | 7          | 133,996,942               | <i>Adam12</i>     | Intron variant          | A/G        | A/A             | F: CTACGAACATTGGCTCTCTGT<br>R: CCACACAAAACACTGAAATTGC | 504               | A F: CATCAGCTTACTTCTTTTCCA<br>G F: TCAGCTTCATTTCTTTCCG                   | 275<br>273        |
| 18        | rs3709624  | 8          | 15,191,287                | <i>rs3709624</i>  | Intron variant          | T/C        | T/T             | F: CACAATGATTTCAAGGGTCCA<br>R: CAAAGGCAAGTCAGGGGTAG   | 500               | T F: TGTAGTTCATTATCAACGAGAATCT<br>C F: TGTAGTTCATTATCAACGAGAATCC         | 315<br>315        |
| 19        | rs13480100 | 9          | 21,450,142                | <i>Dnm2</i>       | Intron variant          | T/C        | T/T             | F: GGCTGGCTTAGTGGCTATCA<br>R: GCCCTGCCAGATTTCTTTT     | 559               | T No allele-specific primers found<br>C No allele-specific primers found |                   |
| 20        | rs13480109 | 9          | 25,889,972                |                   | Intergenic variant      | A/G        | A/A             | F: CCTGGATATTTGGGGGTTT<br>R: AAGGGACAAAATAGCCTCAAAA   | 541               | A No allele-specific primers found<br>G No allele-specific primers found |                   |
| 21        | rs13480122 | 9          | 31,156,626                | <i>Aplp2</i>      | Intron variant          | T/C        | T/T             | F: TGCTGAGATACCATAAACAA<br>R: GAATCCACGCTGACAGTTCA    | 564               | T R: CGGTGAGGTTGTGGGGTA<br>C R: CGGTGAGGTTGTGGGGTTG                      | 315<br>315        |
| 22        | rs13480575 | 10         | 33,653,023                | <i>Gm15939</i>    | Intron variant          | T/C        | T/T             | F: TATCTCGCCTGGTTTGTG<br>R: TGATGAGGGAGTGTGGA AAA     | 490               | T R: GACAAAGGGAGTAGAGATGAAGAAA<br>C No allele-specific primers found     | 325               |
| 23        | rs13480619 | 10         | 57,752,462                |                   | Intergenic variant      | T/C        | T/T             | F: TGTCACGGAGAATTTAGAGCA<br>R: AGATGGGCCCTCTCTTTGTT   | 558               | T F: GCTTCCTACTCTTTGTTTGT<br>C F: GCTTCCTACTCTTTGTTTGT                   | 296<br>296        |

**Supplementary Table 2.** Profile of the 45 selected single nucleotide polymorphism (SNP) markers developed for the C57BL/6J substrains

| Locus No. | dbSNP ID    | Chromosome | Position (bp) (GRCm38.p6) | Linked gene          | SNP type                           | SNP allele | C57BL/6J allele | Allele flanking primer sequence (5' to 3')                 | Product size (bp) | Allele-specific primer sequence (5' to 3')<br>SNP                        | Product size (bp) |
|-----------|-------------|------------|---------------------------|----------------------|------------------------------------|------------|-----------------|------------------------------------------------------------|-------------------|--------------------------------------------------------------------------|-------------------|
| 24        | rs29359333  | 10         | 58,401,504                | <i>Lims1</i>         | Intron variant                     | G/A        | G/G             | F: GCTTCTGTTCACAGCGGATAC<br>R: TGGGTCTAACCTGTACACAT        | 485               | G No allele-specific primers found<br>A F: TGGACTACAGTCACAACAGATTTA      | 226               |
| 25        | rs13480628  | 10         | 67,238,174                | <i>Jmjd1c</i>        | Missense variant                   | T/C        | T/T             | F: TTCTTGCTGCCTCGATCAAT<br>R: GGGAGGAGGAACACATGAAT         | 491               | T R: GCCAGGGATAATCTGAGGCA<br>C R: CCAGGGATAATCTGAGGCC                    | 302<br>301        |
| 26        | rs13459122  | 10         | 80,795,365                | <i>Dot1l</i>         | 3 prime UTR variant                | A/C        | T/T             | F: AAACAGGCAAGCTTTGACAC<br>R: CTCAGTCATCCTTGCCACTC         | 521               | T F: GGAAGAGAACAATGCACCCT<br>A F: GGAAGAGAACAATGCACCCA                   | 241<br>241        |
| 27        | rs13480759  | 10         | 109,378,627               |                      | Intergenic variant                 | C/T        | C/C             | F: TGACTAAGTGTGGCCATTCATC<br>R: TTGAAAATTAGATCGCTCCCTA     | 581               | C F: GCTTTGTCTTCTGTAATGTTTCAC<br>T F: GCCTTTGTCTTCTGTAATGTTTCAT          | 322<br>323        |
| 28        | rs3659787   | 11         | 4,508,730                 | <i>Mtmr3</i>         | Intron variant                     | G/A        | G/G             | F: AGCTCAGGTCAAACATGCAAA<br>R: TTCTTGCTGTCTGAACATCA        | 589               | G R: CCTGCTCAGTGGGTTTGC<br>A R: CCTGCTCAGTGGGTTTGT                       | 307<br>307        |
| 29        | rs13481014  | 11         | 48,117,382                |                      | Intergenic variant                 | T/C        | T/T             | F: TGAAAAATTTCACCATTCAAAGG<br>R: GGTGCACCCTTGAACAAAAC      | 512               | T F: CCAGTGCATAATGTAGGGTGTGT<br>C F: CCAGTGCATAATGTAGGTGTGTC             | 266<br>266        |
| 30        | rs13481117  | 11         | 79,252,230                | <i>Wsb1</i>          | Intron variant                     | G/T        | G/G             | F: TAGTGGCACACGCCTTAAT<br>R: TGTTGCTCCCTTTGAAGAA           | 479               | G F: CCCACCCACCTATTGAACG<br>T F: CCCACCCACCTATTGAAC                      | 300<br>300        |
| 31        | rs13481403  | 12         | 39,488,993                | <i>Gm34923</i>       | Non-coding transcript exon variant | G/A        | G/G             | F: TAGATCCCTTCCCTCAGTC<br>R: CCTGGGCCAAACATATACAA          | 282               | G F: AATGTTATTCAAGGTTGTGGTCAG<br>A F: AATGTTATTCAAGGTTGTGGTCAA           | 200<br>200        |
| 32        | rs13481439  | 12         | 48,965,551                |                      | Intergenic variant                 | A/G        | A/A             | F: AGCTGTGGTTGCAGGATAG<br>R: AGACATGGGATTTGTTTTCG          | 488               | A R: CTATTAGATAGCCAGGAAACAGTAT<br>G No allele-specific primers found     | 391               |
| 33        | rs223935946 | 12         | 56,480,365                |                      | Intergenic variant                 | T/A        | T/T             | F: GAGGTCATGGAGAGGTGCTA<br>R: GTGCTCTCCACTGCTGTCT          | 499               | T R: GGCTCACTGTTAAGAGAGACTGGTA<br>A F: GCTCACTGTTAAGAGAGACTGCTTT         | 271<br>271        |
| 34        | rs13481569  | 12         | 85,645,337                |                      | Intergenic variant                 | G/A        | G/G             | F: GGCTCTCCTTTCACCTCTTC<br>R: CCTTCTCATCTCTGGAT            | 399               | G R: TGGCTTGGTTTTGTGTATGC<br>A R: GAATGGCTTGGTTTTGTGTATGT                | 162<br>165        |
| 35        | rs13481634  | 12         | 106,833,655               | <i>1700013N06Rik</i> | Upstream gene variant              | A/C        | A/A             | F: GATGAGCTGACAGGATGGTC<br>R: ACAGCTTTGTTCTCATTGC          | 300               | A F: TTCTCACACGGGCTCATACA<br>C F: TCTCACACGGGCTCATACC                    | 158<br>157        |
| 36        | rs13481676  | 13         | 6,304,055                 |                      | Intergenic variant                 | A/G        | A/A             | F: TTCTCCCTTTCACATCCTTG<br>R: TTGGAGGGACAAAGAAAGAGA        | 497               | A R: ATGCCACATGCAGCTCCT<br>G R: GCCACATGCAGCTCCC                         | 265<br>263        |
| 37        | rs13481734  | 13         | 27,037,150                | <i>Gm47888</i>       | Intron variant                     | A/G        | A/A             | F: GATGAGGGAGGGAGACCAAT<br>R: GCAAAGGACACTGCTGATAGG        | 529               | A R: AAAGAATTGATCCCAGAACTGAAT<br>G R: AAAGAATTGATCCCAGAACTGAAC           | 300<br>300        |
| 38        | rs3722313   | 13         | 41,442,786                | <i>Nedd9</i>         | Intron variant                     | T/C        | T/T             | F: ATGCTGCAGAAAGGAAAGGA<br>R: CTGAGGTTTCTGCCATAA           | 522               | T F: AAAGAATTGATCCCAGAACTGAAC<br>C F: TGCCTTCTCAGCTCCTTACT               | 246<br>247        |
| 39        | rs31233932  | 14         | 124,108,797               | <i>Fgf14</i>         | Intron variant                     | C/T        | C/C             | F: CTTGTCTCAGTGGCTCCTGT<br>R: GCCAGAAAACCAAGATGAAA         | 507               | C R: AATGAAGAAATCGACAAAATTACCTG<br>T R: GATAATGAAGAAATCGACAAAATTACCTA    | 248<br>251        |
| 40        | rs3702158   | 15         | 57,160,486                |                      | Intergenic variant                 | A/G        | A/A             | F: TGGTTTCTATACATATGCATTATCAA<br>R: AGGTGTTGAGGAGATACATCCA | 521               | A F: GATACTGAGAAAAGGCCAGTTTA<br>G F: ACTGAGAAAAGGCCAGTTTG                | 292<br>289        |
| 41        | rs4165065   | 16         | 17,412,079                | <i>Snap29</i>        | Intron variant                     | T/C        | T/T             | F: AGGACTTCTGAGAACAGGTTGC<br>R: TGTCACGGGAGAAAATGAGA       | 536               | T No allele-specific primers found<br>C No allele-specific primers found |                   |
| 42        | rs13483055  | 17         | 60,319,945                |                      | Intergenic variant                 | T/C        | T/T             | F: GGCTTAAATGACAGCCCTGA<br>R: GCAGCCTACAGTATGGGTGAA        | 536               | T R: TCCTTCTGATAAAGGTCA<br>C R: TCCTTCTGATAAAGGTGCG                      | 292<br>292        |
| 43        | rs13483237  | 18         | 19,289,435                |                      | Intergenic variant                 | G/C        | G/G             | F: CAAACTCAAGAACATCTGGGACT<br>R: TCTTAACTCCTGGCTTGGAA      | 473               | G F: TTAAGGAAATGGTTGAATCTTGG<br>C F: TTAAGGAAATGGTTGAATCTTGG             | 253<br>253        |
| 44        | rs3724876   | 19         | 49,976,154                |                      | Intergenic variant                 | G/T        | G/G             | F: TGACTTTACTGCCCATTTGG<br>R: CCATGTGTGAACCAGCTCCT         | 598               | G F: TCAGGAGATCACAGAGCG<br>T F: GCAGGAGATCACAGAGCT                       | 319<br>319        |
| 45        | rs33867485  | X          | 146,165,950               |                      | Intergenic variant                 | A/T        | A/A             | F: TCAATTTTCCTTTTGGCAGTG<br>R: CCAATGTTCTCAGCATTTCTT       | 447               | A No allele-specific primers found<br>T No allele-specific primers found |                   |

**Supplementary Table 2.** Profile of the 45 selected single nucleotide polymorphism (SNP) markers developed for the C57BL/6J substrains

| Locus No. | dbSNP ID | Chromosome | Position (bp) (GRCm38.p6) | Linked gene | SNP type | SNP allele | C57BL/6J allele | Allele flanking primer sequence (5' to 3') | Product size (bp) | Allele-specific primer sequence (5' to 3') SNP | Product size (bp) |
|-----------|----------|------------|---------------------------|-------------|----------|------------|-----------------|--------------------------------------------|-------------------|------------------------------------------------|-------------------|
|-----------|----------|------------|---------------------------|-------------|----------|------------|-----------------|--------------------------------------------|-------------------|------------------------------------------------|-------------------|

Information about the chromosomal position, linked genes, and SNP type (sequence variant type) was obtained from the Ensembl Mouse Genome Server ([ensembl.org/Mus\\_musculus/Info/Index](http://ensembl.org/Mus_musculus/Info/Index)). SNPs were amplified by PCR with allele flanking primers. PCR was performed using a QIAGEN Multiplex PCR kit (QIAGEN GmbH, Hilden, Germany) according to the manufacturer's protocol. The PCR products were electrophoresed and separated on an E-Gel CloneWell 0.8% SYBR Safe gel using an E-Gel iBase Power system (both from Life Technologies, Carlsbad, CA, USA). Sequencing reactions were performed in a DNA Engine® and Dyad® PTC-220 Peltier Thermal Cycler (Bio-Rad, Laboratories, Inc., Hercules, CA, USA) using an ABI BigDye® Terminator v3.1 Cycle Sequencing Kit with AmpliTaq DNA polymerase (Life Technologies), following the protocols supplied by the manufacturers. Single-pass sequencing was performed on each template primer. The fluorescently labeled fragments were purified from the unincorporated terminators with an ethanol precipitation. The samples were resuspended in distilled water and then subjected to electrophoresis in an ABI 3730xl sequencer (Life Technologies). SNP detection was also performed using the allele-specific PCR method. Two PCR reactions were run in parallel, combining a common forward or reverse allele flanking primer and one of the two reverse or forward allele-specific primers. The PCR products were visualized with agarose gel electrophoresis. All PCR primers were designed using BatchPrimer3 v1.0 ([robes.pw.usda.gov/batchprimer3/index.html](http://robes.pw.usda.gov/batchprimer3/index.html)).

**Supplementary Table 3.** Profile of the 100 selected single nucleotide polymorphism (SNP) markers developed for the C57BL/6N substrains

| Locus No. | dbSNP ID    | Chromosome | Position (bp) (GRCm38.p6) | Linked gene     | SNP type           | SNP allele | C57BL/6NJ allele | Allele flanking primer sequence (5' to 3')           | Product size (bp) | Allele-specific primer sequence (5' to 3')<br>SNP                                | Product size (bp) |
|-----------|-------------|------------|---------------------------|-----------------|--------------------|------------|------------------|------------------------------------------------------|-------------------|----------------------------------------------------------------------------------|-------------------|
| 1         | rs246236360 | 1          | 11,996,705                |                 | Intergenic variant | C/T        | T/T              | F: ACCCCCTGAACCTTCAATTC<br>R: TTTCCTCATGGAATTCGTCTC  | 493               | T No allele-specific primers found.<br>C No allele-specific primers found.       |                   |
| 2         | rs246490354 | 1          | 14,344,561                |                 | Intergenic variant | T/A        | A/A              | F: GGGGAAGAGTGGGATGACTA<br>R: TGGTCAGCATATTCAGTGC    | 506               | A No allele-specific primers found.<br>T No allele-specific primers found.       |                   |
| 3         | rs212521754 | 1          | 16,968,405                |                 | Intergenic variant | C/A        | A/A              | F: GCAACGGAAGAAATTGAAGC<br>R: TGTTGAGGCATGTCCCTTTT   | 500               | A No allele-specific primers found.<br>C No allele-specific primers found.       |                   |
| 4         | rs227394849 | 1          | 19,544,960                |                 | Intergenic variant | A/T        | T/T              | F: GGGCAGAACTTCCTTTTCCT<br>R: TCTCACCTGAGTCCCTGGAT   | 505               | T No allele-specific primers found.<br>A No allele-specific primers found.       |                   |
| 5         | rs232920323 | 1          | 21,639,642                | <i>Kenq5</i>    | Intron variant     | C/G        | G/G              | F: GAAATAGCACAGGTCCATCAAA<br>R: CCCAGCAGACAAGAGACAAA | 501               | G F: AACCCCTCCATTTGTATTTTGTTC<br>C F: AACCCCTCCATTTGTATTTTGTTC                   | 196<br>196        |
| 6         | rs213024334 | 1          | 30,167,141                |                 | Intergenic variant | C/T        | T/T              | F: GGAATCTCAACCTAAGCAGCA<br>R: TGGAAAATTGAAGCAACCAG  | 512               | T No allele-specific primers designed.<br>C No allele-specific primers designed. |                   |
| 7         | rs244794780 | 1          | 40,107,883                | <i>Illr2</i>    | Intron variant     | T/A        | A/A              | F: TCTGTTGCTCTCCAGCATTG<br>R: CTACACCCTGGCCTGACACT   | 500               | A No allele-specific primers designed.<br>T No allele-specific primers designed. |                   |
| 8         | rs260670033 | 1          | 50,146,448                |                 | Intergenic variant | C/T        | T/T              | F: AGCAGAAATGCCAAAATGCT<br>R: TCAGACCCAAAAGGACATGC   | 489               | T No allele-specific primers designed.<br>C No allele-specific primers designed. |                   |
| 9         | rs249907793 | 1          | 61,950,812                | <i>Pard3b</i>   | Intron variant     | C/A        | A/A              | F: CCAGTGGGTTAAGTGGGATT<br>R: ATCAAATGGGGTGGCATTTA   | 494               | A R: TTAATAATGGAGACATGTGGAGGT<br>C R: AAATGGAGACATGTGGAGGG                       | 122<br>119        |
| 10        | rs265151779 | 1          | 83,182,637                | <i>Wdr69</i>    | Intron variant     | G/A        | A/A              | F: ATTCGTACTACTGCGGAGGA<br>R: TTGTTACCCCTTCCCCCTA    | 496               | A No allele-specific primers designed.<br>G No allele-specific primers designed. |                   |
| 11        | rs229124202 | 1          | 89,861,338                | <i>Agap1</i>    | Intron variant     | G/T        | T/T              | F: GGAAGGCAGATCACCAACTC<br>R: TCTATGGTGGCCCTTAGGATG  | 496               | T No allele-specific primers designed.<br>G No allele-specific primers designed. |                   |
| 12        | rs237656339 | 1          | 99,547,673                |                 | Intergenic variant | G/A        | A/A              | F: TGGCTCCTGACATCTTTCTC<br>R: GCTCCTGGATCGGCATATTA   | 516               | A F: TTTTCTGGTGTGTATCTAGGATGAA<br>G F: TTTTCTGGTGTGTATCTAGGATGAG                 | 184<br>184        |
| 13        | rs223540754 | 1          | 110,024,886               | <i>Cdh7</i>     | Intron variant     | G/C        | C/C              | F: GACCAAATGCCTGAAAATGA<br>R: CTCTCCCATCCCTTTCTT     | 500               | C No allele-specific primers designed.<br>G No allele-specific primers designed. |                   |
| 14        | rs259683638 | 1          | 119,116,297               |                 | Intergenic variant | C/T        | T/T              | F: AGGTCTTGGGCTCTTTAGGG<br>R: ACTTGCTGGCTGACTCCTTC   | 501               | T No allele-specific primers designed.<br>C No allele-specific primers designed. |                   |
| 15        | rs229911289 | 1          | 132,980,179               |                 | Intergenic variant | T/A        | A/A              | F: TTTTATTTCTCCGACTTGG<br>R: ACTCGGGAACACACAAGCTC    | 499               | A F: CTAGAGACCAGAGCTAGGTTTTGATA<br>T F: CTAGAGACCAGAGCTAGGTTTTGATT               | 394<br>394        |
| 16        | rs215622703 | 1          | 142,008,378               |                 | Intergenic variant | C/A        | A/A              | F: TTTTGTGTGGCCAAGGAT<br>R: CCTTCTCTCAGAGGGGTTTT     | 521               | A No allele-specific primers designed.<br>C No allele-specific primers designed. |                   |
| 17        | rs239017398 | 1          | 154,474,620               | <i>Caena1e</i>  | Intron variant     | C/T        | T/T              | F: CAGATCCCGGCTCAATTTTA<br>R: AGCTCATTAGCCTGGCATGT   | 501               | T No allele-specific primers designed.<br>C No allele-specific primers designed. |                   |
| 18        | rs214254072 | 1          | 161,859,644               | <i>A1848100</i> | Intron variant     | C/T        | T/T              | F: GTTTGCTCCTCCCTACTC<br>R: TGATGAAAATGTGCAGGTTCTG   | 494               | T No allele-specific primers designed.<br>C No allele-specific primers designed. |                   |
| 19        | rs255914894 | 1          | 172,611,934               |                 | Intergenic variant | G/A        | A/A              | F: ATGCCGGTGTACCTCAGAG<br>R: CCCAGTAAACCATCTCCTG     | 503               | A F: GGATTGGACAGAAAGGTTGG<br>G F: GGGATTGGACAGAAAGGTTGA                          | 166<br>167        |
| 20        | rs222303818 | 1          | 179,503,532               | <i>Smyd3</i>    | Intron variant     | G/A        | A/A              | F: CTGCCATACTCCTGTCCAT<br>R: AGGGCCTGGTACTGAGAACA    | 501               | A No allele-specific primers designed.<br>G No allele-specific primers designed. |                   |
| 21        | rs262282675 | 1          | 188,434,376               | <i>Ush2a</i>    | Intron variant     | A/T        | T/T              | F: ACCCTTTGATGTTCCCAT<br>R: AATTTTGTAGGCCCATGAAT     | 496               | T No allele-specific primers designed.<br>A No allele-specific primers designed. |                   |
| 22        | rs251979693 | 2          | 11,214,185                | <i>Prkcq</i>    | Intron variant     | C/T        | T/T              | F: CCCACATTGCTTATCCAG<br>R: GCCAATTGTGAGGAATGCTT     | 493               | T No allele-specific primers designed.<br>C No allele-specific primers designed. |                   |
| 23        | rs230600693 | 2          | 21,681,174                | <i>Gpr158</i>   | Intron variant     | G/T        | T/T              | F: GGTCCAGCATTATGGCATT<br>R: GTGATCCCATCTGCCATCTT    | 498               | T No allele-specific primers designed.<br>G No allele-specific primers designed. |                   |

**Supplementary Table 3.** Profile of the 100 selected single nucleotide polymorphism (SNP) markers developed for the C57BL/6N substrains

| Locus No. | dbSNP ID    | Chromosome | Position (bp) (GRCm38.p6) | Linked gene          | SNP type           | SNP allele | C57BL/6NJ allele | Allele flanking primer sequence (5' to 3')          | Product size (bp) | Allele-specific primer sequence (5' to 3')<br>SNP                                | Product size (bp) |
|-----------|-------------|------------|---------------------------|----------------------|--------------------|------------|------------------|-----------------------------------------------------|-------------------|----------------------------------------------------------------------------------|-------------------|
| 24        | rs242780245 | 2          | 30,188,488                | <i>Ccbl1</i>         | Intron variant     | A/C        | C/C              | F: CCACTGTCACCAGCACATTC<br>R: CCACCCTCTCTCCGAATA    | 494               | C F: CTAGCAGCCTGGCCATAGA<br>A R: AGCTCTGGGTCTGGCG                                | 294<br>234        |
| 25        | rs228546410 | 2          | 41,205,764                | <i>Lrp1b</i>         | Intron variant     | T/A        | A/A              | F: ATGCCACAATGCAAACATA<br>R: TAGCCCTCTGACTGTCCAC    | 504               | A No allele-specific primers designed.<br>T No allele-specific primers designed. |                   |
| 26        | rs254996546 | 2          | 51,969,852                | <i>Nmi</i>           | Intron variant     | C/T        | T/T              | F: CCGTGACCAAGTATGCACAG<br>R: GCTGAGGGTTCAGTTGTGGT  | 509               | T No allele-specific primers designed.<br>C No allele-specific primers designed. |                   |
| 27        | rs256541267 | 2          | 70,251,451                | <i>Myo3b</i>         | Intron variant     | C/T        | T/T              | F: CTGAAGAAAGCCCTGTTTGG<br>R: CGAATTCATGCTGCCAATA   | 512               | T R: GCTGGCTAGAACTCCCATCA<br>C R: CTGGCTAGAACTCCCATCG                            | 185<br>184        |
| 28        | rs248280077 | 2          | 80,873,138                |                      | Intergenic variant | C/T        | T/T              | F: TGTGCCGATTCCTCTAGCTT<br>R: CTGCACCAATTAGCAGCAA   | 462               | T No allele-specific primers designed.<br>C No allele-specific primers designed. |                   |
| 29        | rs214356625 | 2          | 96,674,180                | <i>Lrrc4c</i>        | Intron variant     | G/T        | T/T              | F: GTGTATGCCCAACCTTTA<br>R: CCAGTGATTGCATTTACCTT    | 469               | T No allele-specific primers designed.<br>G No allele-specific primers designed. |                   |
| 30        | rs224344563 | 2          | 102,710,505               | <i>Slc1a2</i>        | Intron variant     | A/T        | T/T              | F: CAGGACAGGAGAGGGTCAAG<br>R: ATCCAGGCCATAGGATTTT   | 502               | T F: CACTTAACATACTCCGAAGCCT<br>A F: ACTTAACATACTCCGAAGCCA                        | 159<br>158        |
| 31        | rs251933504 | 2          | 112,966,408               | <i>Ryr3</i>          | 3' UTR variant     | T/C        | C/C              | F: GCTCGGTCTGAAAGGTCAAC<br>R: GGAAGCAAGAGCTTGAAGA   | 502               | C No allele-specific primers designed.<br>T No allele-specific primers designed. |                   |
| 32        | rs258508221 | 2          | 122,708,738               | <i>4930417H01Rik</i> | Intron variant     | T/A        | A/A              | F: ACTTTGGCTTTTGCACAC<br>R: GAGGGGATCCAAGGATAAG     | 499               | A No allele-specific primers designed.<br>T No allele-specific primers designed. |                   |
| 33        | rs255014110 | 2          | 132,432,999               | <i>4921508D12Rik</i> | Intron variant     | C/T        | T/T              | F: CAGCACAGATGGTTTCATGG<br>R: AGATGCACAAGTGGCTCTGA  | 505               | T No allele-specific primers designed.<br>C No allele-specific primers designed. |                   |
| 34        | rs242413924 | 2          | 140,793,056               | <i>MacroD2</i>       | Intron variant     | T/G        | G/G              | F: AAATTTTCTCCACACAGCA<br>R: GTGAGCCAGTACAGGGGAGA   | 499               | G R: GTAGAGGATCAGGGAATAGCAGAC<br>T R: GTAGAGGATCAGGGAATAGCAGAA                   | 398<br>398        |
| 35        | rs217443774 | 2          | 152,781,403               | <i>Bcl2l1</i>        | 3' UTR variant     | A/G        | G/G              | F: CTCTTCTTCTGCCCTTCTCT<br>R: AGCCATTGAGTGAGGTGCTT  | 498               | G No allele-specific primers designed.<br>A No allele-specific primers designed. |                   |
| 36        | rs253212197 | 2          | 164,813,748               |                      | Intergenic variant | C/T        | T/T              | F: CTGAACTGCAACCCATCA<br>R: AGTGATGCCCTCCCTGTCT     | 501               | T No allele-specific primers designed.<br>C No allele-specific primers designed. |                   |
| 37        | rs213376233 | 2          | 170,240,434               |                      | Intergenic variant | G/A        | A/A              | F: GCTAAGTGGTCTTGGGATGC<br>R: GCCACCACACACAGCTAATTT | 502               | A No allele-specific primers designed.<br>G No allele-specific primers designed. |                   |
| 38        | rs264719247 | 2          | 180,149,012               | <i>Osbpl2</i>        | Intron variant     | A/G        | G/G              | F: TTCTGTAGGCTTCTGAGTG<br>R: CTCCTCACAACAGGCTCAT    | 502               | G R: GCATCAGCAAGCAGGGAC<br>A R: GCATCAGCAAGCAGGGAT                               | 285<br>285        |
| 39        | rs221521392 | 2          | 181,868,891               | <i>Polr3k</i>        | 3' UTR variant     | C/T        | T/T              | F: TCTTTTGGCTCTGTGGAA<br>R: CGTGCTGTGAGCTCTCTGA     | 502               | T No allele-specific primers found.<br>C No allele-specific primers found.       |                   |
| 40        | rs256520809 | 3          | 8,498,163                 |                      | Intergenic variant | G/A        | A/A              | F: TGCCAGAAGTTTGTTCAGG<br>R: CCATCTGGGGCTGAATACTT   | 505               | A No allele-specific primers designed.<br>G No allele-specific primers designed. |                   |
| 41        | rs214801792 | 3          | 32773111                  |                      | Intergenic variant | G/C        | C/C              | F: TGCTGGGGTAGTTTTCACT<br>R: GGAGGGAGTCAAGTGAATA    | 502               | C F: GACAATTCTCCATAAAAAGGGTCC<br>G F: ACAATTCTCCATAAAAAGGGTCCG                   | 402<br>401        |
| 42        | rs222821429 | 3          | 66,305,330                |                      | Intergenic variant | C/T        | T/T              | F: CACCAACACCCACAGAGTA<br>R: TGTCTTTCAAAGGGCCAGA    | 499               | T F: AGCCATTAACACTGCACAT<br>C F: AGCCATTAACACTGCACAC                             | 219<br>219        |
| 43        | rs243656799 | 3          | 72,616,062                |                      | Intergenic variant | G/A        | A/A              | F: CCCATTGGACACGAAAACCT<br>R: CACTGCTGCTCATTGGTTCA  | 488               | A No allele-specific primers designed.<br>G No allele-specific primers designed. |                   |
| 44        | rs262827930 | 3          | 109,597,274               | <i>Vav3</i>          | Intron variant     | A/T        | T/T              | F: GGCAGTTTGGCCTGTAGGTA<br>R: CTTTACTGGCTTGCCTCACC  | 482               | T F: GCAGTGCCTTCTAGTTCGT<br>A R: AGTCTTACTGCACACCTATCATCTTATT                    | 395<br>136        |
| 45        | rs254145219 | 3          | 147,657,254               |                      | Intergenic variant | C/T        | T/T              | F: CAGCAGGATATGCGTCTCT<br>R: GCTTCCCCTCCATAATTTT    | 487               | T No allele-specific primers found.<br>C R: GAGACAGTGAATGCTTTGTAGGG              | 236               |
| 46        | rs219227155 | 4          | 19,328,298                | <i>Cngb3</i>         | Intron variant     | T/C        | C/C              | F: ACACAAGAAGTGGCACATGG<br>R: TTGGGACCTGTACGCCTATC  | 501               | C No allele-specific primers found.<br>T No allele-specific primers found.       |                   |

**Supplementary Table 3.** Profile of the 100 selected single nucleotide polymorphism (SNP) markers developed for the C57BL/6N substrains

| Locus No. | dbSNP ID    | Chromosome | Position (bp) (GRCm38.p6) | Linked gene          | SNP type               | SNP allele | C57BL/6NJ allele | Allele flanking primer sequence (5' to 3')            | Product size (bp) | Allele-specific primer sequence (5' to 3')<br>SNP                          | Product size (bp) |
|-----------|-------------|------------|---------------------------|----------------------|------------------------|------------|------------------|-------------------------------------------------------|-------------------|----------------------------------------------------------------------------|-------------------|
| 47        | rs235104023 | 4          | 56,463,984                |                      | Intergenic variant     | C/T        | T/T              | F: AGCAGTTGGTGTGTTTGCTG<br>R: CCCCATTGCTTTGTGCTA      | 501               | T No allele-specific primers found.<br>C F: CAGAGAGATCAATCGGTGTCC          | 412               |
| 48        | rs261879287 | 4          | 104,973,294               | <i>1700024P16Rik</i> | Intergenic variant     | T/G        | G/G              | F: GACGAGGAAAAATGAGTGGA<br>R: CAAATGGCATGTTTCGTTTGA   | 499               | G R: TGCTGGCTCTAGAGGTGAAAAC<br>T R: GCTGGCTCTAGAGGTGAAAA                   | 267<br>266        |
| 49        | rs256724446 | 5          | 35,701,259                | <i>Sh3tc1</i>        | Intron variant         | A/G        | A/A              | F: ATTCATTCCCTGACCCATCCA<br>R: CTTCTCAATCCCTCCAT      | 498               | A R: GGAGCCAGGGAAGGTCT<br>G R: GAGCCAGGGAAGGTCC                            | 274<br>273        |
| 50        | rs260260338 | 5          | 80,026,465                |                      | Intergenic variant     | A/G        | A/A              | F: TGGGAAAGAATGTGCCTAC<br>R: TTGGTCCAACATCAAACCTACCT  | 493               | A R: CACAGGCTTTCAGCTCCTTACT<br>G R: ACAGGCTTTCAGCTCCTTACC                  | 153<br>152        |
| 51        | rs217297994 | 5          | 117,118,668               | <i>9530046B11Rik</i> | Non-transcript variant | A/G        | G/G              | F: CCAAGGAGCAGCCCTACTAA<br>R: CAACTCCTGGTCAACGCTCT    | 499               | A F: GGGGAAATACCAGAGAGAGATCA<br>G F: GGGAAATACCAGAGAGATCG                  | 279<br>278        |
| 52        | rs221990668 | 5          | 150,224,989               | <i>Fry</i>           | Intron variant         | G/T        | T/T              | F: CTTGTAGAACCAGCCATC<br>R: GTCCCCACCCATTACATCAG      | 501               | T F: CATAGTAAGCCTTCATTCTTTCTGAT<br>G F: AGTAAGCCTTCATTTCTTTCTGAG           | 316<br>313        |
| 53        | rs257294810 | 6          | 39971164                  |                      | Intergenic variant     | G/A        | A/A              | F: GCATTCAGCTCTCCTTCCTG<br>R: GAGACCTGGGCACAATGACT    | 505               | A F: AGAAGCTCCAGGAGTCACGA<br>G F: GAAGCTCCAGGAGTCACGG                      | 146<br>145        |
| 54        | rs224069095 | 6          | 74169211                  |                      | Intergenic variant     | C/A        | A/A              | F: CTCATCATGACACAAGGAGCA<br>R: CATGTGTGGCCCTAGTTCT    | 509               | A F: AAAAAAAAAATCCTTATCACTTTACAAGA<br>C R: TGCTAAAACCTTTCTTCAGGGG          | 405<br>157        |
| 55        | rs37540455  | 6          | 113159679                 |                      | Intergenic variant     | G/A        | A/A              | F: ATTCCTGGCAGCCCTAGAT<br>R: TGTTGGTGAGAGTCCTCCA      | 502               | A F: AGTACCAGGTGATTCAGGCA<br>G No allele-specific primers found.           | 223               |
| 56        | rs217544076 | 6          | 144513005                 | <i>Sox5</i>          | Intron variant         | G/C        | C/C              | F: CACACATCCATCTGCCTCTG<br>R: GCAGCCGGAGTATTAGCAAG    | 495               | C R: TGTGCTTCTGATCCAGCG<br>G R: ACTGTGCTTCTGATCCAGCC                       | 365<br>367        |
| 57        | rs212452109 | 7          | 16,595,985                | <i>Grhl1</i>         | Intron variant         | A/T        | T/T              | F: GAGTTCAAATCCCTGGGACAA<br>R: GTGTCACGTGGCTGGCTTA    | 501               | T F: CAACAAGAAGGTTTCAGGTGCTT<br>A F: CAACAAGAAGGTTTCAGGTGCTA               | 396<br>396        |
| 58        | rs224103578 | 7          | 53390545                  |                      | Intergenic variant     | C/T        | T/T              | F: GGAGGGAATGTGTCAAGTAAACG<br>R: CCTGACCTCAGTGTGCAGAA | 510               | T R: CCCAGATCCCAATAAATTTCA<br>C F: AAATGAGATGATAAATTCGCTCAC                | 197<br>358        |
| 59        | rs243575509 | 7          | 102,973,309               | <i>Olf-577</i>       | Missense variant       | C/T        | T/T              | F: TCATCACAGGAGGGAAGAGG<br>R: GGCTATCTGTCTCCTTTGC     | 491               | T No allele-specific primers found.<br>C No allele-specific primers found. |                   |
| 60        | rs229340185 | 7          | 140,821,590               | <i>Zfp941</i>        | Intron variant         | A/T        | T/T              | F: CTTCAGGCCCTTACAGAGTA<br>R: GATTCCTATTGGCTGGCTTG    | 500               | T R: CGGCCAAATTTTCCACTATTTA<br>A R: CGGCCAAATTTTCCACTATTTT                 | 378<br>378        |
| 61        | rs263791105 | 8          | 22,903,742                | <i>Myst3</i>         | Intron variant         | G/A        | A/A              | F: CGAATGTGCAATTTGCATCC<br>R: GCCCTTCAACTACCTCACA     | 529               | A F: ACTACAGCCAAGGTCAGAAAA<br>G F: ACTACAGCCAAGGTCAGAAAAG                  | 410<br>410        |
| 62        | rs255341040 | 8          | 58,790,625                | <i>Galnt6</i>        | Intron variant         | G/A        | A/A              | F: GGCAGTGTATCTTGGGAAC<br>R: TGCCAAACAGCACTCAGAAG     | 500               | A No allele-specific primers found.<br>G R: ATTGATTTCTGAAAAATTATACCATTC    | 232               |
| 63        | rs239219835 | 8          | 79,117,401                | <i>Zfp827</i>        | Intron variant         | G/A        | A/A              | F: TAAATGGCCGAATTCACAT<br>R: TGTGCACCTTCCTTTGTCA      | 523               | A R: CCCAGCTGCTATTTCCATT<br>G R: CCCAGCTGCTATTTCCATC                       | 155<br>155        |
| 64        | rs256624163 | 8          | 94,046,068                | <i>Ogfod1</i>        | Intron variant         | G/A        | A/A              | F: TCAGAGCCCAAGAAAAAGG<br>R: CCATGGGTTTACACATTTCA     | 480               | A F: GGAAGAATGAAGCCTGGGA<br>G F: GGAAGAATGAAGCCTGGGG                       | 406<br>406        |
| 65        | rs211750147 | 8          | 118,442,679               | <i>Cdh13</i>         | Intron variant         | G/A        | A/A              | F: TCGGGGCTTAATTTCTCTT<br>R: TGCCTAGACCTGGATTGGT      | 511               | A F: AGCTACAGAGTGCTCCATGACA<br>G F: GCTACAGAGTGCTCCATGACG                  | 221<br>220        |
| 66        | rs52003732  | 9          | 10,125,214                | <i>Cnm5</i>          | Intron variant         | T/C        | C/C              | F: TTCTCCCTCTGTGAGCAAG<br>R: TTGCCACCACCTCAAAAACCT    | 464               | C R: CCCTTCATTTGTTCTTATACCG<br>T R: ACCCTTCATTTGTTCTTATACCA                | 178<br>179        |
| 67        | rs214490504 | 9          | 60,662,109                | <i>Lrrc49</i>        | Intron variant         | G/A        | A/A              | F: TCATCCCGAACATAAATGG<br>R: AGTCTCGCAATACGACTGC      | 499               | A R: ACTGAGAAATGATCTCCTCCAGATGT<br>G F: GCTACCTGGTGTGCCCG                  | 375<br>166        |
| 68        | rs243500146 | 9          | 116,160,235               | <i>Tgfb2</i>         | Intron variant         | C/T        | T/T              | F: CAGAAGGATCTGGACTTGC<br>R: CTCTTATCTCCCGCCAGA       | 489               | T F: GTATGCAGCCAACCTCAACTGTAAT<br>C F: GTATGCAGCCAACCTCAACTGTAAC           | 119<br>119        |
| 69        | rs51123066  | 10         | 11,070,460                | <i>Grm1</i>          | Intron variant         | G/T        | T/T              | F: CAAGGCCCTGTAAATCCTT<br>R: CGAGGGCTTAGCATATTTCA     | 493               | T No allele-specific primers found.<br>G F: CCTGTTCTTATCACTAGAGTCG         |                   |



**Supplementary Table 3.** Profile of the 100 selected single nucleotide polymorphism (SNP) markers developed for the C57BL/6N substrains

| Locus No. | dbSNP ID    | Chromosome | Position (bp) (GRCm38.p6) | Linked gene          | SNP type           | SNP allele | C57BL/6NJ allele | Allele flanking primer sequence (5' to 3')          | Product size (bp) | Allele-specific primer sequence (5' to 3') SNP                                   | Product size (bp) |
|-----------|-------------|------------|---------------------------|----------------------|--------------------|------------|------------------|-----------------------------------------------------|-------------------|----------------------------------------------------------------------------------|-------------------|
| 70        | rs219489973 | 10         | 41,944,745                | <i>Armc2</i>         | Intron variant     | G/A        | A/A              | F: CCTCGGCTAACTTCAAGCAC<br>R: GCCTGTGCGCTTACTTTGAT  | 492               | A F: CCTCCTTGGGCACATCA<br>G F: CCTCCTTGGGCACATCG                                 | 365<br>3665       |
| 71        | rs213583872 | 10         | 49,357,252                | <i>Grik2</i>         | Intron variant     | G/T        | T/T              | F: GTTGACACAGGCTGAGAATGA<br>R: CCCAAATGAATTGCAAAGGT | 540               | T R: GCAGTACAGCAATAACACGA<br>G R: GCAGTACAGCAATAACACGC                           | 217<br>217        |
| 72        | rs246274290 | 10         | 88,091,833                | <i>Pmch</i>          | Missense variant   | T/C        | C/C              | F: CACAGAACACAGGCTCCAAA<br>R: GCCAACATGGTCGGTAGACT  | 499               | C F: TCCACACAGGAAAAGAGAGACAC<br>T F: TCCACACAGGAAAAGAGAGACAT                     | 371<br>371        |
| 73        | rs223857079 | 11         | 12,253,003                | <i>Cobl</i>          | Intron variant     | A/T        | T/T              | F: CTGGTTTGGAGGTGAGCATT<br>R: AAAAGCTCCGGAAGGTGAAT  | 498               | T F: CTGTCAGCTCTGCCTTTCTT<br>A F: ACTTGCAGCTCTGCCTTTCTA                          | 119<br>120        |
| 74        | rs240617401 | 11         | 46,222,615                | <i>Cyfp2</i>         | Missense variant   | G/A        | A/A              | F: TGACCCCAATCACACATTA<br>R: GCCAGCTTATCCATCTGCAC   | 505               | A F: TCCATCCACCCACCTGTAA<br>G F: CATCCACCCACCTGGAG                               | 137<br>135        |
| 75        | rs231656457 | 12         | 29886947                  | <i>Myt1l</i>         | Intron variant     | T/G        | G/G              | F: TCTTGGTTAAGGTGGCAAGG<br>R: ATTCACAAATGTCGGCATCA  | 500               | G F: CAGTTCCTTGTATGACTCCTTGAG<br>T F: CAGTTCCTTGTATGACTCCTTGAT                   | 353<br>353        |
| 76        | rs217422777 | 12         | 70772479                  |                      | Intergenic variant | C/T        | T/T              | F: CCGGAAAAACATAACACACC<br>R: ACCCTGCTCTCCTTGACAAA  | 497               | T F: GAGGCTGCATCCCAGATTT<br>C F: GAGGCTGCATCCCAGATTC                             | 366<br>366        |
| 77        | rs221345442 | 12         | 97702669                  |                      | Intergenic variant | A/T        | T/T              | F: TCCTCTCACCCGTATCTGCT<br>R: GCGTCTTCAGAGACCTTCTCA | 489               | T R: TTGTCTGTGTTTGTGTGGAA<br>A R: TTTGTCTGTGTTTGTGTGGAT                          | 334<br>335        |
| 78        | rs226310424 | 13         | 41494375                  |                      | Intergenic variant | G/C        | C/C              | F: CATCTCCATGGTCTCGATA<br>R: TCCACAGTTCAGCCAAAGG    | 500               | C F: CAACATCCCATGTGCC<br>G F: CAACATCCCATGTCCCG                                  | 219<br>219        |
| 79        | rs230596409 | 13         | 64921972                  | <i>Spata31</i>       | Stop gained        | C/T        | T/T              | F: GGTGTGACCATGAGCCTTC<br>R: CTGGGGTGAGCTTAGGCTCG   | 511               | T R: GGCAGTAAAACGACTTCGCA<br>C No allele-specific primers found.                 | 152               |
| 80        | rs251507217 | 13         | 101112155                 |                      | Intergenic variant | A/T        | T/T              | F: CCCTGTACCCTCAATCATC<br>R: TTCTCCCCACCTCTGATGTC   | 500               | T R: ACTTTCTGGGATGAAATAAGAGAGTTA<br>A R: CTTTCTGGGATGAAATAAGAGAGTTT              | 212<br>211        |
| 81        | rs242991609 | 13         | 119477808                 | <i>4833420G17Rik</i> | Missense variant   | C/A        | A/A              | F: TTTTGGCTGTGCAATCTTIG<br>R: CACACAGAGGTCGCCTATCA  | 517               | A F: TCTTTTTGGATGGCGTCAA<br>C F: TGTCTTTTTGGATGGCGTTAC                           | 247<br>249        |
| 82        | rs265193270 | 14         | 39164780                  | <i>Nrg3</i>          | Intron variant     | C/T        | T/T              | F: GGCCATCTCATCAGTGACATA<br>R: AGGCTGACATGGTTTTGAGC | 502               | T F: CCACCTCTAATGTGGTGTGT<br>C No allele-specific primers found.                 | 345               |
| 83        | rs235428682 | 14         | 75727727                  | <i>Cog3</i>          | Synonymous variant | G/A        | A/A              | F: ACATCTCCAGCTTCCAGACC<br>R: GAGGCGGTGACTATGAAGGA  | 492               | A F: CATAACATACCAGACTTTCTTAAACCAATA<br>G F: AACATACCAGACTTTCTTAAACCAATG          | 252<br>249        |
| 84        | rs222607275 | 14         | 117850332                 | <i>Gpc6</i>          | Intron variant     | G/A        | A/A              | F: TTGTGGTTTCAGGAATGTGC<br>R: GGCAAACCTTCTGCCTCAGA  | 497               | A F: GGAGCCAGCACTCGGA<br>G R: TCACAATAGCACTGCCTCAATC                             | 385<br>149        |
| 85        | rs243245803 | 15         | 22748238                  | <i>Cdh18</i>         | Intron variant     | T/G        | G/G              | F: TGTTCCTGAGAGGGTTTGC<br>R: TTTGGGAAAAGACAAGGAGA   | 492               | G No allele-specific primers designed.<br>T No allele-specific primers designed. |                   |
| 86        | rs243400512 | 15         | 55816925                  | <i>Sntb1</i>         | Intron variant     | C/T        | T/T              | F: TCAGAGGCTGAAGTGACAGC<br>R: GGGCAGTCTGTCTGTGGAAG  | 512               | T No allele-specific primers designed.<br>C No allele-specific primers designed. |                   |
| 87        | rs231321125 | 15         | 97760563                  | <i>Rapgef3</i>       | Intron variant     | C/G        | G/G              | F: CTCTCACGAGGACATGAGCA<br>R: GGCTCCCCAGTAAAACATGA  | 507               | G No allele-specific primers designed.<br>C No allele-specific primers designed. |                   |
| 88        | rs230243864 | 16         | 20462996                  |                      | Intergenic variant | C/T        | T/T              | F: TGGGGGCTTATCTTTTCAC<br>R: ACTTAACCAAGCCAGGA      | 500               | T No allele-specific primers designed.<br>C No allele-specific primers designed. |                   |
| 89        | rs240948896 | 16         | 61450798                  |                      | Intergenic variant | G/A        | A/A              | F: TGGAGCATGACAAGGAATCA<br>R: TTTGCAAAATCCATGATTGG  | 491               | A No allele-specific primers designed.<br>G No allele-specific primers designed. |                   |
| 90        | rs240067957 | 17         | 40854409                  |                      | Intergenic variant | C/T        | T/T              | F: TGCTCATGGTAAATGCTGGA<br>R: TCAGCACTCAGGTGATTTC   | 515               | T No allele-specific primers designed.<br>C No allele-specific primers designed. |                   |
| 91        | rs259144033 | 17         | 69131609                  |                      | Intergenic variant | C/T        | T/T              | F: CATGCACACGGCAGTAGAAG<br>R: CAGAGGTGAAACCAGGAAGA  | 506               | T No allele-specific primers designed.<br>C No allele-specific primers designed. |                   |
| 92        | rs225963780 | 18         | 22530101                  | <i>Asxl3</i>         | 3' UTR variant     | G/T        | T/T              | F: AGCGGTATGCTTGTCTTGTAT<br>R: ACAAGGCCAAATATTGCTG  | 485               | T No allele-specific primers designed.<br>G No allele-specific primers designed. |                   |

**Supplementary Table 3.** Profile of the 100 selected single nucleotide polymorphism (SNP) markers developed for the C57BL/6N substrains

| Locus No. | dbSNP ID    | Chromosome | Position (bp) (GRCm38.p6) | Linked gene   | SNP type           | SNP allele | C57BL/6NJ allele | Allele flanking primer sequence (5' to 3')          | Product size (bp) | Allele-specific primer sequence (5' to 3')<br>SNP                                | Product size (bp) |
|-----------|-------------|------------|---------------------------|---------------|--------------------|------------|------------------|-----------------------------------------------------|-------------------|----------------------------------------------------------------------------------|-------------------|
| 93        | rs214638331 | 18         | 41344993                  |               | Intergenic variant | T/C        | C/C              | F: CTGCCAGATAAGCCACCAAT<br>R: TCACCAATGACAGAGCAAAAA | 495               | C No allele-specific primers designed.<br>T No allele-specific primers designed. |                   |
| 94        | rs255789242 | 18         | 59519801                  |               | Intergenic variant | C/T        | T/T              | F: TTCCTAGCTTGGAAAACCT<br>R: TCTTCCTGGAGTTGCCCTA    | 481               | T No allele-specific primers designed.<br>C No allele-specific primers designed. |                   |
| 95        | rs263687961 | 18         | 90448757                  |               | Intergenic variant | A/G        | G/G              | F: TTCCTATGTGGTCATTGAA<br>R: TGAGCTAAATTTGGAGCAAGC  | 507               | G No allele-specific primers designed.<br>A No allele-specific primers designed. |                   |
| 96        | rs232414357 | 19         | 23329888                  | <i>Mamdc2</i> | Intron variant     | C/T        | T/T              | F: CAGCCCTCCCTTTATCTTC<br>R: GTATGCCCTGTGGGTCTA     | 492               | T No allele-specific primers designed.<br>C No allele-specific primers designed. |                   |
| 97        | rs230656170 | 19         | 40364531                  | <i>Sorbs1</i> | Intron variant     | G/A        | A/A              | F: AGCGCTCGCTTGGACATAAT<br>R: TGGGACAGGAGGAGTTACA   | 500               | A No allele-specific primers designed.<br>G No allele-specific primers designed. |                   |
| 98        | rs246037535 | X          | 84805631                  | <i>Dmd</i>    | Intron variant     | C/T        | T/T              | F: CCCTAGGGCAACATGGTAAA<br>R: CATTCCGTGCAAAATGAGATG | 493               | T No allele-specific primers designed.<br>C No allele-specific primers designed. |                   |
| 99        | rs266019057 | X          | 112095948                 |               | Intron variant     | A/G        | G/G              | F: GGTGGCAGAGATGGAACAT<br>R: CTGTCTTGCTTGGTCGCTAA   | 559               | G No allele-specific primers designed.<br>A No allele-specific primers designed. |                   |
| 100       | rs212226666 | X          | 157445480                 | <i>Sms</i>    | 3' UTR variant     | T/A        | A/A              | F: TGCACCTGCACATCCTACAG<br>R: GGGGTTGGGTTTCATTT     | 500               | A No allele-specific primers designed.<br>T No allele-specific primers designed. |                   |

Information about the chromosomal position, linked genes, and SNP type (sequence variant type) was obtained from the Ensembl Mouse Genome Server ([ensembl.org/Mus\\_musculus/Info/Index](http://ensembl.org/Mus_musculus/Info/Index)). SNPs were amplified by PCR with allele flanking primers. PCR was performed using a QIAGEN Multiplex PCR kit (QIAGEN GmbH, Hilden, Germany) according to the manufacturer's protocol. The PCR products were electrophoresed and separated on an E-Gel CloneWell 0.8% SYBR Safe gel using an E-Gel iBase Power system (both from Life Technologies, Carlsbad, CA, USA). Sequencing reactions were performed in a DNA Engine® and Dyad® PTC-220 Peltier Thermal Cycler (Bio-Rad, Laboratories, Inc., Hercules, CA, USA) using an ABI BigDye® Terminator v3.1 Cycle Sequencing Kit with AmpliTaq DNA polymerase (Life Technologies), following the protocols supplied by the manufacturers. Single-pass sequencing was performed on each template primer. The fluorescently labeled fragments were purified from the unincorporated terminators with an ethanol precipitation. The samples were resuspended in distilled water and then subjected to electrophoresis in an ABI 3730xl sequencer (Life Technologies). SNP detection was also performed using the allele-specific PCR method. Two PCR reactions were run in parallel, combining a common forward or reverse allele flanking primer and one of the two reverse or forward allele-specific primers. The PCR products were visualized with agarose gel electrophoresis. All PCR primers were designed using BatchPrimer3 v1.0 ([robes.pw.usda.gov/batchprimer3/index.html](http://robes.pw.usda.gov/batchprimer3/index.html)).
